# Supplementary material
Source: publisher figshare collection journal article supplement (https://acs.figshare.com/ndownloader/files/4608589)
Supplement: Supplementary file 1 [file 4608589]

**Supporting Information:**

**Transfer of Electron Density and Formation of Dative Bonds in  
Chemisorption of Pyrrolidine on Si(111)-7×7**

Feng Tao<sup>†</sup>, Yinghui Cai<sup>‡</sup>, Yuesheng Ning<sup>‡</sup>, Guo-Qin Xu<sup>‡</sup> and Steven L. Bernasek<sup>†\*</sup>

Department of Chemistry, Princeton University, Princeton, New Jersey 08544 <sup>†</sup>

Department of Chemistry, National University of Singapore, 10 Kent Ridge, Singapore, 119260 <sup>‡</sup>

**Schematic of electron density distribution in (100) semiconductor surface dimers  
and Layer-by-layer Reconstruction of A Si(111)7×7 unit cell**

See Figures S1 and S2.

**Top and Side Views of the Three-dimensional Structure of a Si(111)-7×7 Unit Cell.**

See Figure S3.

**Construction and Optimization of a Si<sub>9</sub>H<sub>12</sub> Cluster Containing an Adatom and an  
Adjacent Rest Atom from A Large Cluster with Three 7×7 Unit Cells**

See Figure S4.

**Observation of Weak Vibrational Feature due to Si-H Stretching**

Figure S5 replots Figure 3 by shrinking the X-axis (vibrational frequency) for a clearer view of the Si-H vibrational feature. The weak vibrational feature at ~ 2100 cm<sup>-1</sup> can be found in the region of 2000-2200 cm<sup>-1</sup> in Figure S5.

### Assignment of Vibrational Feature at $\sim 578\text{ cm}^{-1}$

Figure S6 shows the spectra of a chemisorbed monolayer collected at both specular and off-specular geometries. Only vibrational spectra in the region of 200-1900  $\text{cm}^{-1}$  are shown for a clearer comparison. Figure S6a is the spectrum of a chemisorbed monolayer collected at a specular geometry. Figures S6b and S6c are spectra of the same sample collected at two off-specular geometries. Notably, the intensity of the peak at  $\sim 578\text{ cm}^{-1}$  is significantly decreased in the off-specular geometry of  $50^\circ$  ( $\Delta\theta = -10^\circ$ ), suggesting a major contribution from dipole scattering for the excitation of this vibrational mode. Surprisingly, it disappears at an off-specular geometry of  $45^\circ$ . A disappearance of a vibrational mode at off-specular geometry is unusual because in principle the impact scattering should still contribute to the intensity to some extent<sup>1,2</sup>. Obviously, the rate of decrease in the peak intensity at  $\sim 578\text{ cm}^{-1}$  is much greater than for all the other peaks such as those at  $\sim 1476$ ,  $\sim 1324$ , and  $\sim 918\text{ cm}^{-1}$ . If the vibrational peak at  $\sim 578\text{ cm}^{-1}$  in the spectra of the chemisorbed monolayer results from a ring-deformation mode which can be identified at  $\sim 630\text{ cm}^{-1}$  in the physisorbed multilayers (Figures 3c and 3d), it should have a rate of decrease in peak intensity similar to the peaks at  $\sim 1476$ ,  $\sim 1324$ , and  $\sim 918\text{ cm}^{-1}$ , and at least it should be observable at an off-specular geometry of  $45^\circ$ . Thus, it is suggested that the peak at  $\sim 578\text{ cm}^{-1}$  in Figure S6a cannot be assigned to the ring-deformation mode. Alternatively, it may be attributed to the stretching mode of the N $\cdots$ Si dative bond. Because the N $\cdots$ Si dative bonds are buried below the dative-bonded molecules, the relatively large  $\text{C}_4\text{H}_8\text{N}$  ring could prevent the incoming electron beam from scattering from the vibrational motion of the buried N $\cdots$ Si dative bond.

through an impact scattering mechanism<sup>1,2</sup>. Thus, in the spectrum of the off-specular geometry with a large off-specular angle, the vibrational feature at  $\sim 578\text{ cm}^{-1}$  disappears.

## References

- (1) Ibach, H. *Electron Energy Loss Spectrometers: The Technology of High Performance*, Springer-Verlag, Berlin, **1990**.
- (2) Ibach, H. *Electron Spectroscopy for Surface Analysis*, Springer-Verlag, Berlin, **1977**.

*Figure S1*

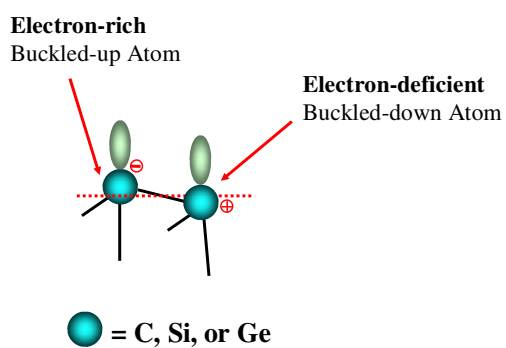

**Figure S1.** Scheme illustrating the unequal distribution of electron density between the two atoms of a surface dimer on the (100) surfaces of elemental semiconductor single crystals (Germanium, Silicon, and Diamond). The red dashed line marks the position of the surface dimer without tilting.

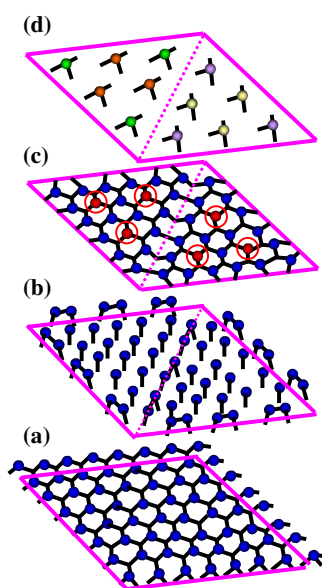

**Figure S2.** Layer-by-layer construction of a Si(111)-7 $\times$ 7 unit cell. (a) Base layer with 49 silicon atoms. (b) Dimer layer. (c) Rest-atom layer; Balls marked with red color represent rest atoms. (d) Adatom layer. Solid pink lines mark the borders of a Si(111)-7 $\times$ 7 unit cell. Dashed pink line marks the border between two halves of one 7 $\times$ 7 unit cell.

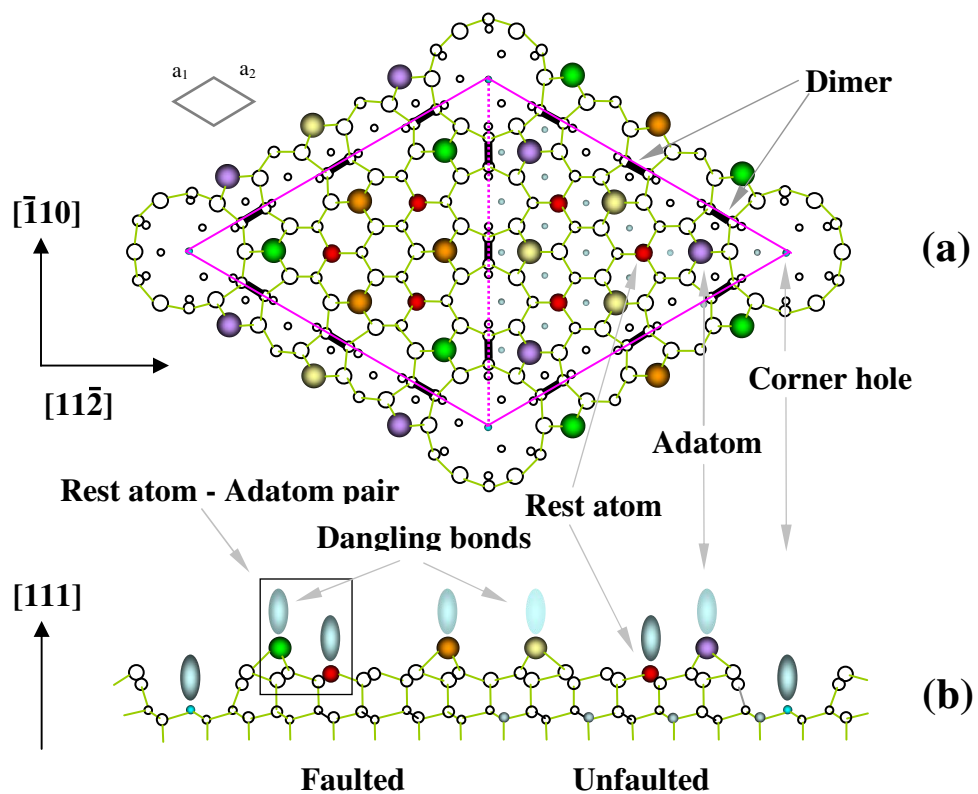

**Figure S3.** Three-dimensional structure of a Si(111)-7×7 unit cell.

(a) Top view. (b) Side view. The pink solid lines mark the borders of a unit cell.

The pink dashed line marks the border of a half unit cell.

Figure S4

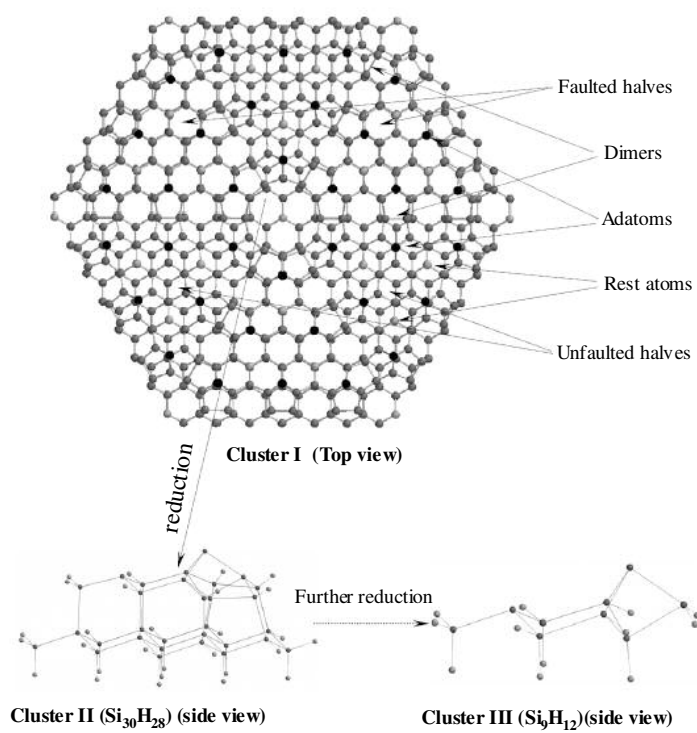

Figure S4. Constructed and Optimized Clusters I, II, III.

Figure S5

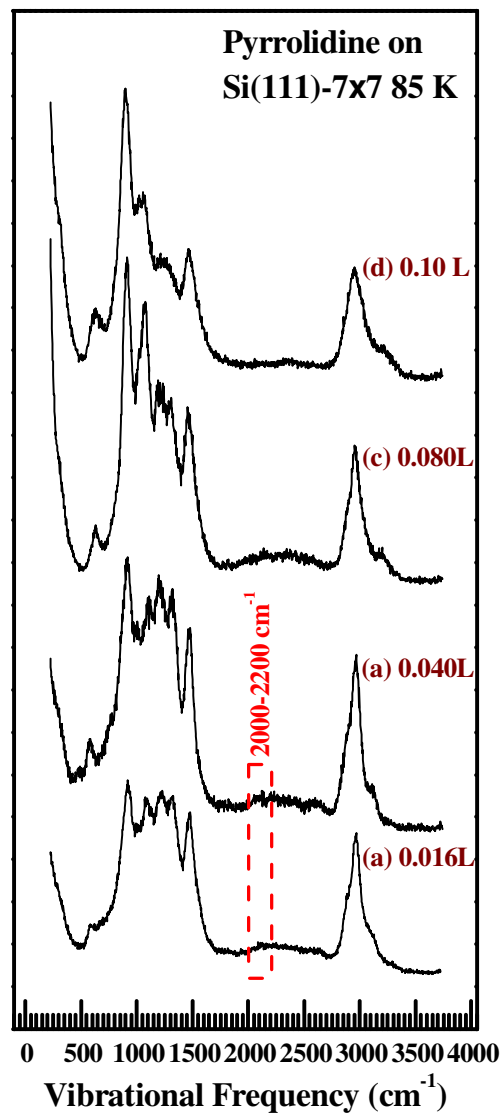

Figure S5. HREELS spectra of pyrrolidine adsorbed on a clean Si(111)-7x7 at 85 K as a function of pyrrolidine exposure.



Figure S6

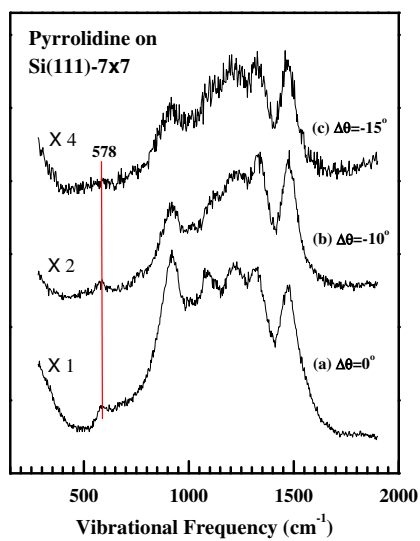

Figure S6. Spectra of a chemisorbed monolayer collected at both specular (a) and off-specular (b and c) geometries.
